# Supplementary material for: Genetic Variance in the Spinocerebellar Ataxia Type 2 (ATXN2) Gene in Children with Severe Early Onset Obesity
Source: PubMed Central journal article supplement (PMC2791421; doi:10.1371/journal.pone.0008280), 2009-12-14
Supplement: pone.0008280.s002.pdf [file pone.0008280.s002.pdf]

Allele Frequency in 9 Populations (n)

| Allele | Repeat Structure                   | Total repeat | Mixed Population (n=184) <sup>a</sup> | Caucasian Only* (n=154) <sup>a</sup> | CEU (n=110) <sup>b</sup> | French (n=17) <sup>c</sup> | Spanish (n=11) <sup>d</sup> | Polish (n234) <sup>e</sup> | Indian (n=215) <sup>f</sup> | CHB (n=86) <sup>b</sup> | JPT (n=129) <sup>b, g, h</sup> | YRI (n=106) <sup>b</sup> | Total in all populations (n=1092) |
|--------|------------------------------------|--------------|---------------------------------------|--------------------------------------|--------------------------|----------------------------|-----------------------------|----------------------------|-----------------------------|-------------------------|--------------------------------|--------------------------|-----------------------------------|
| 1      | (CAG)8CAA(CAG)5                    | 14           |                                       |                                      |                          |                            |                             | 0.004 (1)                  |                             |                         |                                |                          | 0.001 (1)                         |
| 2      | (CAG)6CAA(CAG)8                    | 15           |                                       |                                      |                          |                            |                             |                            |                             |                         | 0.008 (1)                      |                          | 0.001 (1)                         |
| 3      | (CAG)8CAA(CAG)8                    | 17           |                                       |                                      |                          | 0.118 (2)                  | 0.273 (3)                   |                            |                             |                         |                                |                          | 0.005 (5)                         |
| 4      | (CAG)9CAA(CAG)8                    | 18           |                                       |                                      |                          |                            |                             |                            | 0.005 (1)                   |                         |                                |                          | 0.001 (1)                         |
| 5      | (CAG)13CAA(CAG)5                   | 19           |                                       |                                      |                          |                            |                             | 0.004 (1)                  |                             |                         | 0.008 (1)                      |                          | 0.002 (2)                         |
| 6      | (CAG)10CAA(CAG)8                   | 19           |                                       |                                      | 0.009 (1)                |                            |                             |                            |                             |                         |                                |                          | 0.001 (1)                         |
| 7      | (CAG)12CAA(CAG)8                   | 21           |                                       | 0.006 (1)                            |                          |                            |                             | 0.004 (1)                  | 0.005 (1)                   |                         |                                |                          | 0.002 (2)                         |
| 8      | (CAG)8CAA(CAG)4CAA(CAG)7           | 21           | 0.005 (1)                             | 0.006 (1)                            |                          |                            |                             |                            |                             |                         | 0.023 (3)                      |                          | 0.004 (4)                         |
| 9      | (CAG)22                            | 22           |                                       |                                      |                          |                            |                             |                            |                             |                         |                                | 0.009 (1)                | 0.001 (1)                         |
| 10     | (CAG)8CAA(CAG)13                   | 22           | 0.005 (1)                             | 0.006 (1)                            |                          |                            |                             |                            |                             |                         |                                | 0.009 (1)                | 0.002 (2)                         |
| 11     | (CAG)10CAA(CAG)11                  | 22           | 0.005 (1)                             | 0.006 (1)                            |                          |                            |                             |                            |                             |                         |                                |                          | 0.001 (1)                         |
| 12     | (CAG)13CAA(CAG)8                   | 22           | 0.14 (26)                             | 0.136 (21)                           | 0.173 (19)               | 0.118 (2)                  |                             | 0.145 (34)                 | 0.205 (44)                  | 0.442 (38)              | 0.217 (28)                     | 0.132 (14)               | 0.188 (205)                       |
| 13     | (CAG)8CAA(CAG)4CAA(CAG)8           | 22           | 0.696 (128)                           | 0.688 (106)                          | 0.727 (80)               | 0.529 (9)                  | 0.455 (5)                   | 0.765 (179)                | 0.707 (152)                 | 0.558 (48)              | 0.744 (96)                     | 0.358 (38)               | 0.673 (735)                       |
| 14     | (CAG)8CAA(CAG)5CAA(CAG)7           | 22           | 0.005 (1)                             |                                      |                          |                            |                             |                            |                             |                         |                                |                          | 0.001 (1)                         |
| 15     | (CAG)23                            | 23           |                                       |                                      |                          |                            |                             |                            | 0.005 (1)                   |                         |                                | 0.019 (2)                | 0.003 (3)                         |
| 16     | (CAG)9CAA(CAG)4CAA(CAG)8           | 23           | 0.005 (1)                             | 0.006 (1)                            |                          |                            |                             | 0.004 (1)                  | 0.005 (1)                   |                         |                                |                          | 0.003 (3)                         |
| 17     | (CAG)13CAA(CAG)9                   | 23           | 0.043 (8)                             | 0.052 (8)                            | 0.009 (1)                |                            |                             | 0.021 (5)                  | 0.014 (3)                   |                         |                                |                          | 0.016 (17)                        |
| 18     | (CAG)14CAA(CAG)8                   | 23           | 0.049 (9)                             | 0.058 (9)                            | 0.064 (7)                |                            |                             | 0.030 (7)                  | 0.014 (3)                   |                         |                                |                          | 0.024 (26)                        |
| 19     | (CAG)8CAA(CAG)14                   | 23           | 0.005 (1)                             | 0.006 (1)                            |                          | 0.059 (1)                  |                             |                            |                             |                         |                                | 0.028 (3)                | 0.005 (5)                         |
| 20     | (CAG)8CAA(CAG)5CAA(CAG)8           | 23           | 0.016 (3)                             |                                      |                          | 0.059 (1)                  |                             |                            |                             |                         |                                | 0.377 (40)               | 0.040 (44)                        |
| 21     | (CAG)8CAA(CAG)4CAA(CAG)9           | 23           |                                       |                                      |                          |                            |                             |                            | 0.009 (2)                   |                         |                                |                          | 0.002 (2)                         |
| 22     | (CAG)24                            | 24           |                                       |                                      |                          |                            |                             |                            | 0.009 (2)                   |                         |                                |                          | 0.002 (2)                         |
| 23     | (CAG)15CAA(CAG)8                   | 24           |                                       |                                      |                          |                            |                             | 0.004 (1)                  |                             |                         |                                | 0.038 (4)                | 0.004 (5)                         |
| 24     | (CAG)25                            | 25           | 0.011 (2)                             | 0.013 (2)                            |                          |                            |                             |                            |                             |                         |                                |                          | 0.002 (2)                         |
| 25     | (CAG)13CAA(CAG)11                  | 25           | 0.005 (1)                             | 0.006 (1)                            |                          |                            |                             |                            |                             |                         |                                |                          | 0.001 (1)                         |
| 26     | (CAG)15CAA(CAG)9                   | 25           |                                       |                                      |                          |                            | 0.091 (1)                   |                            |                             |                         |                                |                          | 0.001 (1)                         |
| 27     | (CAG)16CAA(CAG)8                   | 25           |                                       |                                      |                          |                            |                             |                            |                             |                         |                                | 0.009 (1)                | 0.001 (1)                         |
| 28     | (CAG)13CAA(CAG)2CAA(CAG)8          | 25           |                                       |                                      |                          |                            |                             |                            |                             |                         |                                | 0.009 (1)                | 0.001 (1)                         |
| 29     | (CAG)13CAA(CAG)13                  | 27           | 0.005 (1)                             | 0.006 (1)                            |                          |                            |                             |                            |                             |                         |                                |                          | 0.002 (1)                         |
| 30     | (CAG)8CAA(CAG)4CAA(CAG)4CAA(CAG)8  | 27           |                                       |                                      | 0.018 (2)                | 0.059 (1)                  | 0.091 (1)                   | 0.013 (3)                  |                             |                         |                                |                          | 0.006 (7)                         |
| 31     | (CAG)12CAA(CAG)5CAA(CAG)9          | 28           |                                       |                                      |                          | 0.059 (1)                  |                             |                            |                             |                         |                                |                          | 0.001 (1)                         |
| 32     | (CAG)29                            | 29           |                                       |                                      |                          |                            |                             |                            | 0.005 (1)                   |                         |                                |                          | 0.001 (1)                         |
| 33     | (CAG)8CAA(CAG)4CAA(CAG)4CAA(CAG)10 | 29           |                                       |                                      |                          |                            | 0.091 (1)                   | 0.004 (1)                  | 0.005 (1)                   |                         |                                |                          | 0.003 (3)                         |
| 34     | (CAG)8CAA(CAG)5CAA(CAG)5CAA(CAG)8  | 29           |                                       |                                      |                          |                            |                             |                            |                             |                         |                                | 0.009 (1)                | 0.001 (1)                         |
| 35     | (CAG)20CAA(CAG)8                   | 29           |                                       |                                      |                          |                            |                             |                            | 0.005 (1)                   |                         |                                |                          | 0.001 (1)                         |
| 36     | (CAG)13CAA(CAG)7CAA(CAG)8          | 30           |                                       |                                      |                          |                            |                             |                            | 0.009 (2)                   |                         |                                |                          | 0.002 (2)                         |

<sup>a</sup> Pulst et al (2007), <sup>b</sup> Gibbs et al (2005), <sup>c</sup> Imbert et al (1996), <sup>d</sup> Pujana et al (1999), <sup>e</sup> Krzyzosiak et al (2004), <sup>f</sup> Choudhry et al, <sup>g</sup> Mizuhima et al (1999), <sup>h</sup> Sanpei et al (1996)

\* This number is contained within the n=184 of the Mixed population
